# Supplementary material
Source: publisher site journal article supplement (http://www.kjim.org/upload/media/kjim-2021-194-suppl1.pdf)
Supplement: Supplementary file 1 [file kjim-2021-194-suppl1.pdf]

**Supplementary Table 1. The changes in diabetes medication in each subjects during follow-up period**

| Variable                                  | Subject                                                     | Changes in 1 year follow-up<br>(n = 10)                                            | Changes in 5-year follow-up<br>(n = 25)                             |
|-------------------------------------------|-------------------------------------------------------------|------------------------------------------------------------------------------------|---------------------------------------------------------------------|
| <i>H. pylori</i> -negative                | 6                                                           |                                                                                    | New administration of metformin                                     |
|                                           | 8                                                           | Additional metformin and sulfonylurea                                              | Discontinuation of metformin and sulfonylurea                       |
|                                           | 13                                                          |                                                                                    | New administration of metformin and sulfonylurea                    |
|                                           | 15                                                          |                                                                                    | New administration of mitglinide and insulin                        |
|                                           | 30                                                          | Increased dose of metformin and sulfonylurea                                       |                                                                     |
|                                           | 32                                                          | Additional DPP-4 inhibitor                                                         | Discontinuation of DPP-4 inhibitor                                  |
|                                           | 36                                                          |                                                                                    | Additional metformin                                                |
| <i>H. pylori</i> -positive non-eradicated | 45                                                          |                                                                                    | New administration of sulfonylurea and DPP-4 inhibitor              |
|                                           | 46                                                          |                                                                                    | Additional DPP-4 inhibitor                                          |
|                                           | 58                                                          |                                                                                    | New administration of metformin, sulfonylurea and thiazolidinedione |
|                                           | 61                                                          | Increased dose of metformin, new administration of $\alpha$ -glucosidase inhibitor |                                                                     |
|                                           | 63                                                          |                                                                                    | New administration of metformin                                     |
| <i>H. pylori</i> -positive eradicated     | 71                                                          | Increased dose of metformin, new administration of sulfonylurea                    |                                                                     |
|                                           | 75                                                          |                                                                                    | Discontinuation of metformin                                        |
|                                           | 76                                                          |                                                                                    | Increased dose of metformin, new administration of SGLT2 inhibitor  |
|                                           | 90                                                          |                                                                                    | Additional DPP-4 inhibitor                                          |
|                                           | 91                                                          | New administration and continuously increased dose of metformin                    |                                                                     |
|                                           | 95                                                          | New administration of metformin                                                    |                                                                     |
|                                           |                                                             |                                                                                    | Additional sulfonylurea and $\alpha$ -glucosidase inhibitor         |
|                                           | 100                                                         |                                                                                    | Additional DPP-4 inhibitor                                          |
|                                           | 103                                                         | Decreased dose of DPP-4 inhibitor                                                  | Discontinuation of DPP-4 inhibitor                                  |
|                                           | 109                                                         | Additional sulfonylurea and meglitinide                                            |                                                                     |
|                                           | 111                                                         |                                                                                    | New administration of metformin and sulfonylurea                    |
|                                           | 117                                                         |                                                                                    | Additional DPP-4 inhibitor                                          |
|                                           | 121                                                         |                                                                                    | Additional $\alpha$ -glucosidase inhibitor                          |
| 123                                       | Additional sulfonylurea and $\alpha$ -glucosidase inhibitor | Discontinuation of sulfonylurea and $\alpha$ -glucosidase inhibitor                |                                                                     |

DPP-4, dipeptidyl peptidase-4; SGLT2, sodium-glucose cotransporter 2.
